# Supplementary material for: Yemeni Perceptions of China's Belt and Road Initiative
Source: Research Square preprint supplement (doi:10.21203/rs.3.rs-8078314/v1), 2026-01-30
Supplement: Supplementary file 1 [file 88a9c07a3f56e325eb84f566.docx]

**Table 1** For Cronbach's Alpha test

| Cronbach Value of coefficient | statement |
| --- | --- |
| 0.886 | Questionnaire paragraphs |

**Table 2** Demographic information’s of survey participants

| **Gender** |  |  |  | **Male** | **Female** | **Total** |
| --- | --- | --- | --- | --- | --- | --- |
|  |  |  | 329 (78.5%) | 90 (21.5%) | 419 (100%) |
| **Age** | **18 – 24y** | **25 – 34y** | **35 – 44y** | **45 - 60y** | **61 – 80y** | **Total** |
| 77 (24%) | 229 (54.7%) | 81 (19.3%) | 28 (6.6%) | 4 (0.95) | 419 (100%) |
| **Education** | **High School** | **Undergraduate** | **Master** | **Ph.D.** | **Postdoctoral** | **Total** |
| 37 (8.8%) | 200 (47.7%) | 113 (27%) | 69 (16.5%) | 4 (0.9 %) | 419 (100%) |
| **Geographical Area** | **West** | **North** | **South** | **Middle** | **East** | **Total** |
| 117 (27.9%) | 195 (46.7%) | 31 (7.5%) | 52 (12.41%) | 24 (5.7%) | 419 (100%) |

**Table 4**. Yemeni's perception of China's development

| **Statistical regulations** | **significance level** | **verbal appreciation** | **standard deviation** | **Compare** |  |
| --- | --- | --- | --- | --- | --- |
| Difference exists | 0.000 | Excellent/Very much agree | 0.975 | 4.33 | **What do you think of China's development** |
| Difference exists | 0.000 | Excellent/Very much agree | 0.832 | 4.56 | **What are your views on China's economic development** |
| Difference exists | 0.000 | Excellent/agree | 1.214 | 3.63 | **What do you think of China's political developments** |
| Difference exists | 0.000 | Excellent/Very much agree | 0.856 | 4.53 | **What do you think of China's rapid development** |
| Difference exists | 0.000 | Excellent/agree | 1.035 | 4.08 | **What do you think of the quality of China's development** |
| Difference exists | 0.000 | Excellent/Very much agree | 0.77 | 4.22 | **grand mean axis** |

**Table 8**. Yemeni perceptions on belt and road initiative

| **Statistical regulations** | **significance level** | **verbal appreciation** | **standard deviation** | **Compare** |  |
| --- | --- | --- | --- | --- | --- |
| Difference exists | 0.000 | positive influence/Very much agree | 0.887 | 4.67 | **Do you think the "One Belt, One Road" initiative will benefit Yemen's future development** |
| Difference exists | 0.000 | maybe/agree | 1.09846 | 4.0082 | **Do you think "One Belt, One Road " initiative will have a positive impact on Yemen's future political stability** |
| Difference exists | 0.000 | Yes/strongly agree | 1.107 | 4.42 | **Do you think "One Belt, One Road " initiative will help Yemen's future infrastructure development** |
| Difference exists | 0.000 | Yes/strongly agree | 0.619 | 4.83 | **If the Belt and Road Initiative has positively impacted the development of Yemen, do you support its implementation in Yemen** |
| Difference exists | 0.000 | Yes/strongly agree | 0.954 | 4.43 | **Yemen joins "One Belt, One Road. "Is it suitable for us Yemenis** |
| Difference exists | 0.000 | Yes/strongly agree | 1.137 | 4.19 | **Do you think the Belt and Road Initiative will help the overall development of Yemen** |
| Difference exists | 0.000 | Yes/strongly agree | 0.88440 | 4.5484 | **From your perspective, do you think there any benefits China will gain from the “One Belt, One Road " initiative** |
| Difference exists | 0.000 | maybe/agree | 1.271 | 3.98 | **Do you think China's growing influence is a good thing for Yemen** |
| Difference exists | 0.000 | Yes/strongly agree | 0.70803 | 4.7393 | **Can Yemen learn from China's development experience** |
| Difference exists | 0.000 | Yes/strongly agree | 0.857 | 4.62 | **Does China think the "One Belt, One Road "Initiative will create jobs and an investment environment in Yemen** |
| Difference exists | 0.000 | Yes/strongly agree | 1.319 | 4.51 | **What do you think of China's “Belt and Road” Initiative is foreign policy better than that of other great powers** |
| Difference exists | 0.000 | Yes/strongly agree | 0.59632 | 4.3566 | **grand mean axis** |

**Table 9** Test showing differences by type

| **Statistical regulations** | **significance level** | **Value V** | **standard deviation** | **average** | **type** |  |
| --- | --- | --- | --- | --- | --- | --- |
| By calculating the average, male and female responses were different. Both men and women believe the Belt and Road Initiative between Yemen and China has positively impacted both countries. Still, women are more optimistic about the Yemen-China Road Initiative. | 0.000 | 4.132 | 0.56 | 4.41 | male | **Axis: A sample study of China-Yemen "Belt and Road" development trends** |
|  |  |  | 0.64 | 4.13 | female |  |
| The difference between male and female responses and calculated averages suggests that both men and women believe that the Belt and Road Initiative between Yemen and China will positively impact both countries. Still, this time, men appear to be more confident that the Chinese government is doing a real job in achieving China's goals and development performance. | 0.000 | 4.17 | 0.73 | 4.31 | male | **axis: China Development Research Sample** |
|  |  |  | 0.84 | 3.90 | female |  |

**Table 10** showing age difference test

| **significance level** | **Value q** | **ordinary box** | **free score** | **sum of square** |  |  |
| --- | --- | --- | --- | --- | --- | --- |
| 0.098 | 1.969 | 0.694 | 4 | 2.775 | Between groups | **Axis: Yemen-China One Belt, One Road Sample Research Trends for Initiatives** |
|  |  | 0.352 | 414 | 145.862 | within the group |  |
|  |  |  | 418 | 148.637 | total |  |
| 0.687 | 0.567 | 0.341 | 4 | 1.366 | Between groups | **axis: China Development Research Sample** |
|  |  | 0.602 | 414 | 249.366 | within the group |  |
|  |  |  | 418 | 250.732 | total |  |

**Fig. 7** Yemen imports from China between 2000 to 2022

**Fig. 7** Yemen imports from China between 2000 to 2022

**Fig. 7** Yemen imports from China between 2000 to 2022
