# Supplementary material for: Yemeni Perceptions of China's Belt and Road Initiative
Source: Research Square preprint supplement (doi:10.21203/rs.3.rs-8078314/v1), 2026-01-30
Supplement: Supplementary file 1 [file cf02393f22194b6415b49ca3.pdf]

# Ethical Approval Application

**Master of International Politics, Lanzhou University**

**Project Title:** Yemeni Perspectives on China's Role in Yemen's Politics and Development: Perceptions, Relations, and Political Dynamics (2012–2025).

**Student:** HAZEM MOJAHED AMMAR/ ALKAHTANI SAAD BINMUAADH

**Supervisor:** Prof. Changxian Zhou

## Section A Project Information

| Item                         | Details                                                                                                                              |
|------------------------------|--------------------------------------------------------------------------------------------------------------------------------------|
| Project Title                | Yemeni Perspectives on China's Role in Yemen's Politics and Development: Perceptions, Relations, and Political Dynamics (2012–2025). |
| Student Name                 | Hazem Mojahed Ammar/ Alkahtani Saad Binmuaadh                                                                                        |
| Supervisor Name              | Prof. Changxian Zhou                                                                                                                 |
| Email                        | <a href="mailto:yahya2021@lzu.edu.cn">yahya2021@lzu.edu.cn</a> / <a href="mailto:saad2023@lzu.edu.cn">saad2023@lzu.edu.cn</a>        |
| Estimated Start Date         | April 2025                                                                                                                           |
| Estimated End Date           | November 2025                                                                                                                        |
| Estimated Start of Fieldwork | May 2025                                                                                                                             |
| Estimated End of Fieldwork   | November 2025                                                                                                                        |

## Section B Ethics Approval Statement

Ethical approval for this study will be sought from the Institutional Review Board (IRB) of Lanzhou University. The research will comply with all relevant national and institutional ethical guidelines.

- Ethical approval for this study will be requested from the Ethics Committee of Lanzhou University, School of Politics and International Relations (application pending approval) as a requisite for the Journal.
- If secondary data from national surveillance sources or health records are used, all necessary data use permissions and de-identification processes will be followed prior to analysis.

## **Participants and Data Sources**

- The study will use Primary data with human participants through Online survey.
- Data will include Yemeni People views on China and their attitude towards the Chinese project “Belt and Road Initiative” in Yemen.

## **Recruitment, Consent, and Confidentiality**

- **Data Source:** Outcome from the online survey.
- **Consent:** As retrospective and anonymized data will be used, individual consent is not required under standard practice, but institutional permission and ethical approval are mandatory.
- **Confidentiality:** All data will be handled according to university and international data protection policies. Personal identifiers (if present) will be removed.

## **Risks and Mitigation**

- No direct risks to participants, as only Primary data are used.
- Strict adherence to confidentiality and data protection guidelines.

## Section D Ethics Checklist

## Section E Additional Statements

| Question                                                              | Yes/<br>No | Notes                                             |
|-----------------------------------------------------------------------|------------|---------------------------------------------------|
| Will non-anonymized or identifiable data be used?                     | No         | Only anonymized, aggregated data will be used     |
| Will data include photographs, audio, or video recordings?            | No         |                                                   |
| Any risk of physical or psychological harm to researcher or subjects? | No         |                                                   |
| Are participants given a chance to withdraw from study?               | N/A        | Not applicable (retrospective anonymized data)    |
| Involvement of vulnerable groups?                                     | No         |                                                   |
| Any risk of harm/detriment to participants?                           | No         |                                                   |
| Access to sensitive data about living individuals?                    | Yes        | Data will be anonymized and managed per protocols |
| Has any similar application been refused before?                      | No         |                                                   |

## Informed Consent

Not applicable—only anonymized secondary data will be analyzed.

## Animal Welfare

Not applicable—no animals involved.

## **Funding**

This research receives no specific grant from any funding agency in the public, commercial, or not-for-profit sectors.

## **Conflict of Interest**

The author(s) declare(s) no conflict of interest.

## **Section F Declarations**

### **Researcher Declaration:**

I confirm that the information in this application is accurate and that I will conduct the research in accordance with institutional and professional ethical guidelines. Should the protocol change in any way, I will seek further approval as required.

**Student's Signature:**

**BinAmmar**

**Date: 2025/11/26**



### **Supervisor Declaration:**

As the supervisor for this project, I confirm that all research ethical issues have been considered in accordance with Lanzhou University policy and public health research guidelines.

**Supervisor's Signature:**

**Prof. Zhou Changxian**

**Date: 2025/12/14**

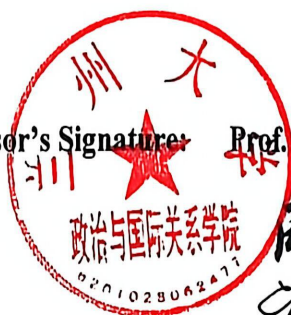

**周长鲜**  
*Changxian Zhou*
